# Supplementary material for: Metabolic engineering for the high-yield production of isoprenoid-based C5 alcohols in E. coli
Source: PubMed Central journal article supplement (PMC4459108; doi:10.1038/srep11128), 2015-06-08

1 **Supplemental Material**

2 Metabolic engineering for the high-yield production of isoprenoid-based C<sub>5</sub>  
3 alcohols in *E. coli*

4

5 Kevin W. George<sup>1,2</sup>, Mitchell G. Thompson<sup>1,3</sup>, Aram Kang<sup>1,2</sup>, Edward Baidoo<sup>1,2</sup>, George

6 Wang<sup>1,2</sup>, Leanne Jade G. Chan<sup>1,2</sup>, Paul D. Adams<sup>1,2</sup>, Christopher J. Petzold<sup>1,2</sup>, Jay D.

7 Keasling<sup>1,2,4,5</sup> Taek Soon Lee<sup>1,2,\*</sup>

8

9

10

11

12

13

14

15

16

17

18

19

1 **Supplemental Table 1. RBS sequences used in NudB engineering.**

| <b>Name</b>     | <b>Sequence</b>           | <b>Predicted translation initiation rate</b> |
|-----------------|---------------------------|----------------------------------------------|
| RBS0 (from KG1) | TTTCACACAGGAAACAGACC      | N/A*                                         |
| RBS1            | TTAAAGACGCAGATACTT        | 5.42                                         |
| RBS2            | GTTAAGAAGCAGATACCCAT      | 375.41                                       |
| RBS3            | GTAAAGAAGCAGATACAGTT      | 410.76                                       |
| RBS4            | GGCGTAAACTACATACAGGAGGGAC | 1027.83                                      |
| RBS5            | TTAAGACGGAGATACAGTT       | 1657.65                                      |
| RBS6            | GTACAGAAGGAGATACTT        | 5341.55                                      |
| RBS7            | TTAAGGAAGGAGATAGACTT      | 8008.93                                      |
| RBS8            | TGACAGAAGGAGATAGAGTT      | 23586.28                                     |
| RBS9            | TTTAAGAAGGAGATATAGTT      | 25807.73                                     |
| RBS10           | TTTAAGAAGGAGATATACAT      | 26784.21                                     |

2 \*RBS0 was the input sequence used to generate RBS1 through RBS10

3

4

5

6

7

8

9

1 **Supplemental Figure S1. Strain KG1 pathway proteomics.** Samples were collected and  
2 analyzed for MVA pathway proteins in strain KG1 over a 48 hour time-course to assess stability  
3 and identify potential bottlenecks. A targeted SRM method was used (see methods). Time 0  
4 represents the point of induction (OD=0.4). Error bars represent standard deviation (n=3).

5

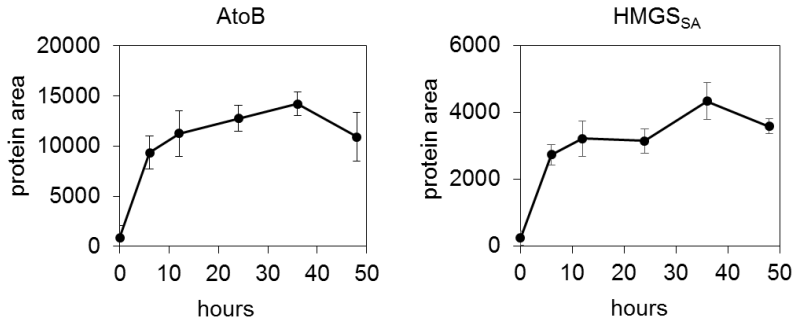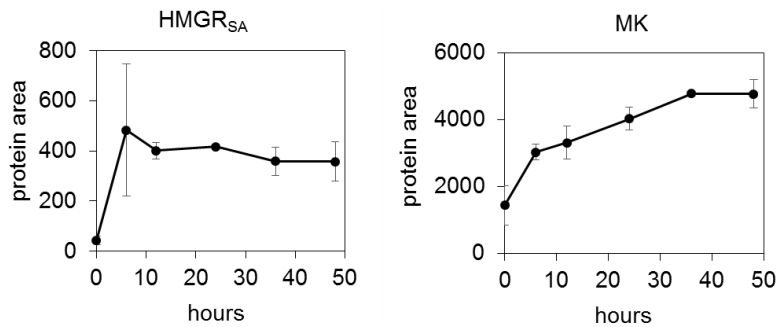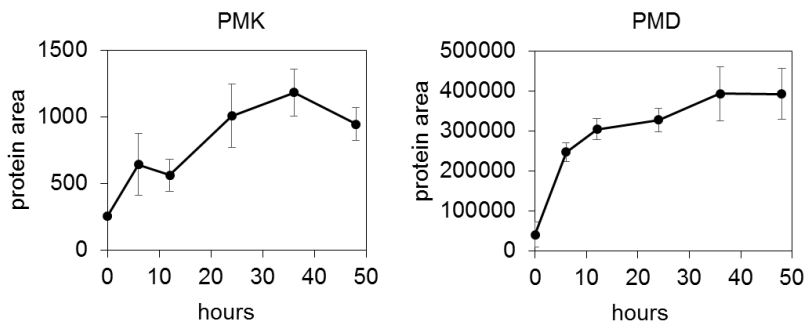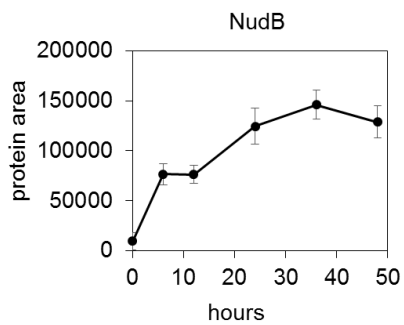

1 **Supplemental Figure S2. Third plasmid NudB expression does not further improve titer.**

2 The introduction of a supplemental plasmid (“pNudB” or pBbB8k-NudB, see Table 1) did not  
3 improve 3-methyl-3-buten-1-ol titer in strains KG1 or KG2. This suggested that IPP  
4 accumulation was no longer a bottleneck in these strains. An empty vector was used as a control  
5 (pEmpty). Error bars show standard deviation (n=3).

6

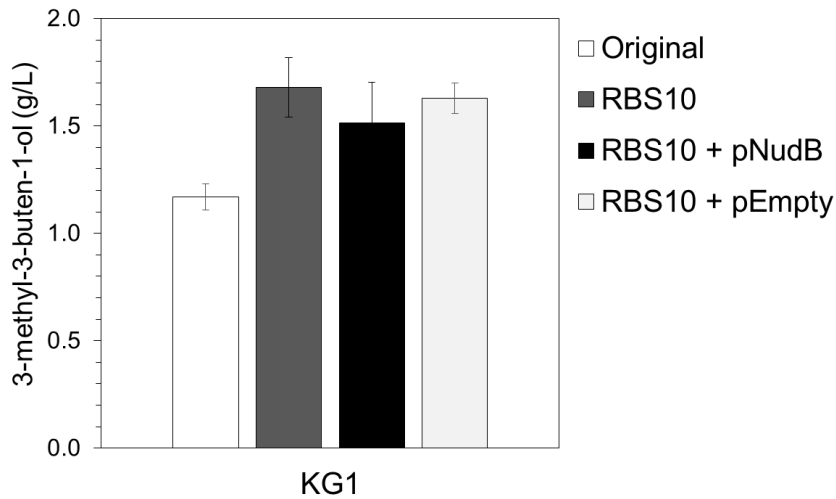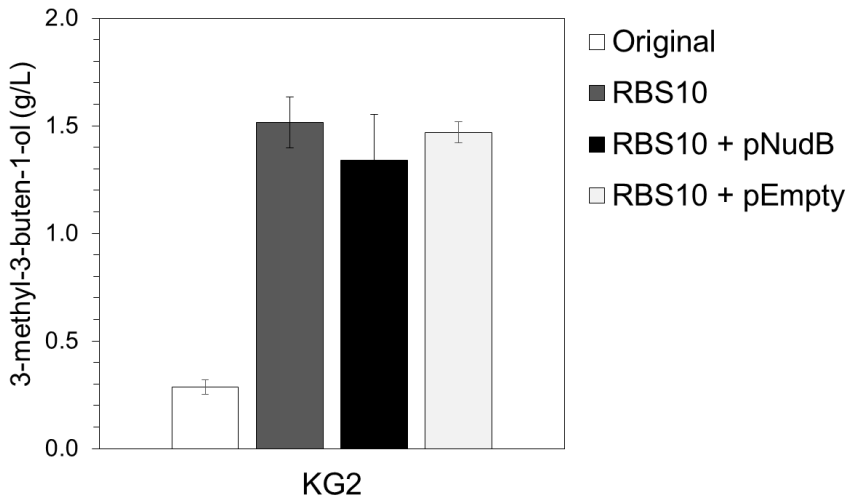

1 **Supplemental Figure S3. Growth inhibition caused by expression of MK<sub>MM</sub>.** Growth  
2 inhibition was clearly observed in strain KG5, containing MK from *M. mazei*. Improved NudB  
3 expression (KG5<sub>R10</sub>) relieved this inhibition, suggesting that IPP accumulation was the primary  
4 cause of this growth defect. Note that no inhibition was observed in strains carrying MK  
5 enzymes from *S. cerevisiae* and *S. aureus* (KG4 and KG6, respectively). Error bars show  
6 standard deviation (n=3).

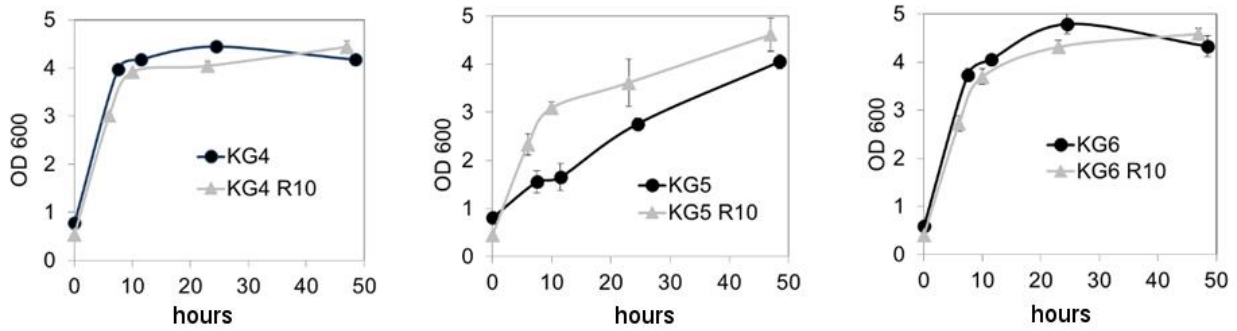

7

8

9

10

11

12

13

1

2 **Supplemental Figure S4. Decreased recoverable 3-methyl-3-buten-1-ol in late time points.**

3 A minor decrease in recoverable 3-methyl-3-buten-1-ol was observed in strain KG1 at time  
4 points past 48 hours, suggestive of volatility or perhaps transformation. Error bars represent  
5 standard deviation (n=3).

6

7

8

9

10

11

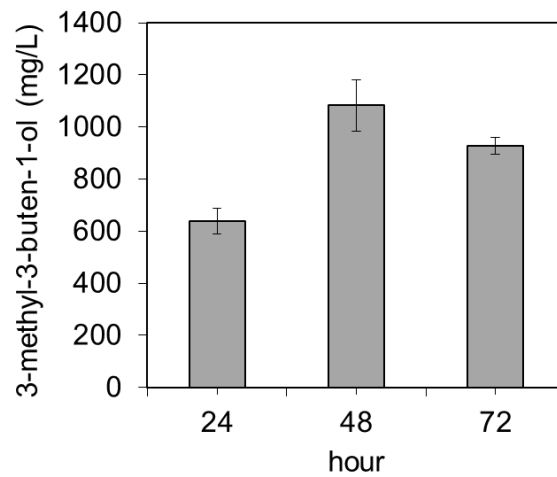

12

13

14

15

16

17

18

1

2 **Supplemental Figure S5. Volatility of 3-methyl-3-buten-1-ol, 3-methyl-2-buten-1-ol, and 3-**  
3 **methyl-1-butanol.** Various concentrations of each C5 alcohol were spiked into culture tubes  
4 containing 5 mL of medium and incubated at 30°C in an orbital shaker (200 rpm). A decrease in  
5 recoverable alcohol was observed in each case, indicating product loss to volatility. Control  
6 tubes that were incubated at 4°C showed no decreases in recoverable alcohol. Error bars show  
7 standard deviation (n=3).

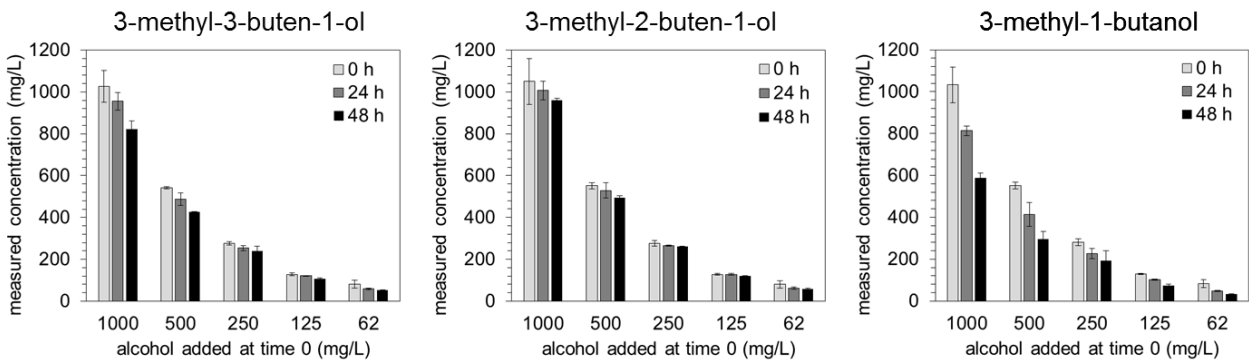

8

9

10

11

12

13

14

15

1

2 **Supplemental Figure S6. Oleyl alcohol partitioning.** Each alcohol was added at a  
3 concentration of 1000 mg/L to 5 mL of culture medium containing various concentrations of  
4 oleyl alcohol overlay. These solutions were shaken (200 rpm) at 30°C for 1 hour. After  
5 incubation, samples of the aqueous phase were taken and alcohols were quantified by GC-FID.  
6 3-methyl-1-butanol partitioned most readily into the overlay. For each alcohol, increased  
7 overlay content resulted in increased partitioning into the oleyl alcohol phase. Error bars show  
8 standard deviation (n=3). A 20% overlay was used in production assays with strains KG1<sub>R10</sub> and  
9 KG9.

10

11

12

13

14

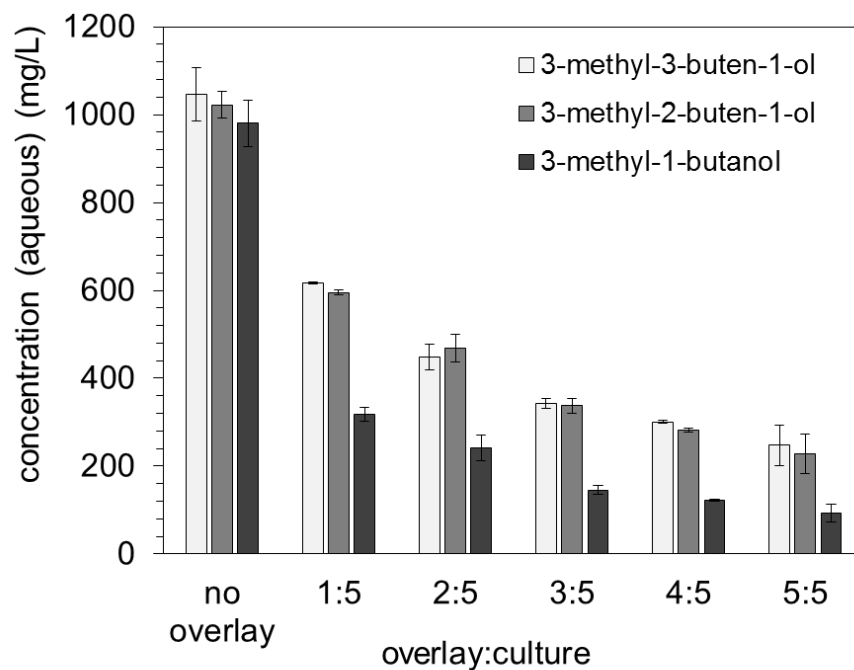

Supplement: srep11128-s1.pdf [file srep11128-s1.pdf]
